# Supplementary material for: Distinct and Atypical Intrinsic and Extrinsic Cell Death Pathways between Photoreceptor Cell Types upon Specific Ablation of Ranbp2 in Cone Photoreceptors
Source: PLOS journal article supplement (doi:10.1371/journal.pgen.1003555), 2013-06-20

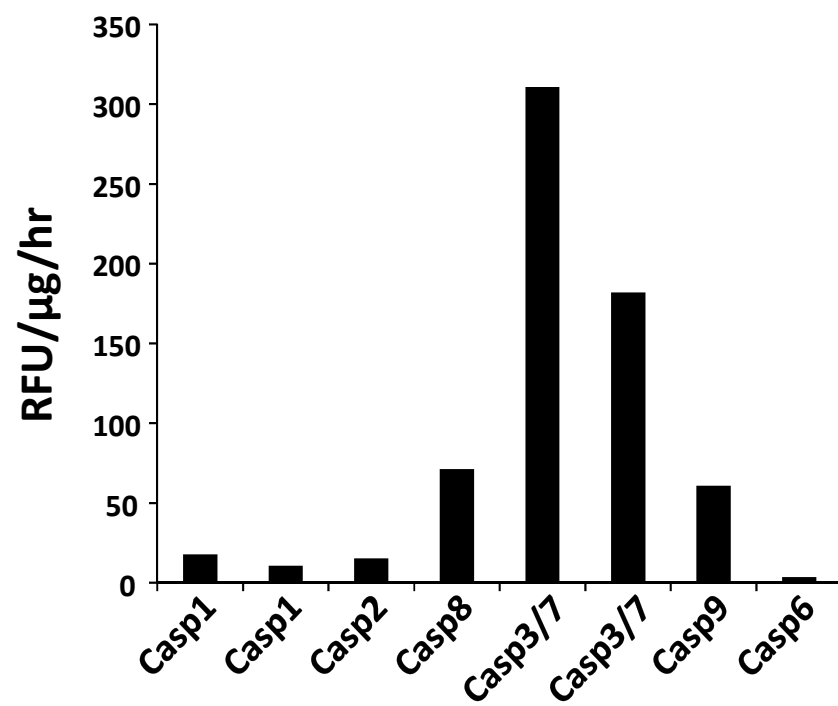

Supplement: S5 (10.1371/journal.pgen.1003555.s005) [file journal.pgen.1003555.s005]
